# Supplementary material
Source: PubMed Central journal article supplement (PMC7136862)
Supplement: jamapediatr-174-e200223-s001.pdf [file jamapediatr-174-e200223-s001.pdf]

## Supplementary Online Content

García-Hermoso A, Alonso-Martínez AM, Ramírez-Vélez R, Pérez-Sousa MA, Ramírez-Campillo R, Izquierdo M. Association of physical education with improvement of health-related physical fitness outcomes and fundamental motor skills among youth: a systematic review and meta-analysis. *JAMA Pediatr*. Published online April 6, 2020. doi:10.1001/jamaneurol.2014.0223

**eTable 1.** Risk of Bias Within Studies

**eTable 2.** Synthesis of Pooled Results According to Education Level

**eFigure 1.** Forest Plot Showing the Effect Size (Hedges  $g$ ) of Quality-Based Physical Education Interventions on Body Mass Index Between Intervention and Control Groups for Each Study

**eFigure 2.** Forest Plot Showing the Effect Size (Hedges  $g$ ) of Quality-Based Physical Education Interventions on Waist Circumference Between Intervention and Control Groups for Each Study

**eFigure 3.** Forest Plot Showing the Effect Size (Hedges  $g$ ) of Quality-Based Physical Education Interventions on Skinfolds Thickness Between Intervention and Control Groups for Each Study

**eFigure 4.** Forest Plot Showing the Effect Size (Hedges  $g$ ) of Quality-Based Physical Education Interventions on Body Fat Between Intervention and Control Groups for Each Study

**eFigure 5.** Forest Plot Showing the Effect Size (Hedges  $g$ ) of Quality-Based Physical Education Interventions on Lean Body Mass Between Intervention and Control Groups for Each Study

**eFigure 6.** Forest Plot Showing the Effect Size (Hedges  $g$ ) of Quality-Based Physical Education Interventions on Cardiorespiratory Fitness Between Intervention and Control Groups for Each Study

**eFigure 7.** Forest Plot Showing the Effect Size (Hedges  $g$ ) of Quality-Based Physical Education Interventions on Muscular Strength Between Intervention and Control Groups for Each Study

**eFigure 8.** Forest Plot Showing the Effect Size (Hedges  $g$ ) of Quality-Based Physical Education Interventions on Speed Agility Between Intervention and Control Groups for Each Study

**eFigure 9.** Forest Plot Showing the Effect Size (Hedges  $g$ ) of Quality-Based Physical Education Interventions on Fundamental Motor Skills Between Intervention and Control Groups for Each Study

**eFigure 10.** Forest Plot Showing the Effect Size (Hedges  $g$ ) of Quantity-Based Physical Education Interventions on Body Mass Index Between Intervention and Control Groups for Each Study

**eFigure 11.** Forest Plot Showing the Effect Size (Hedges  $g$ ) of Quantity-Based Physical Education Interventions on Waist Circumference Between Intervention and Control Groups for Each Study

**eFigure 12.** Forest Plot Showing the Effect Size (Hedges  $g$ ) of Quantity-Based Physical Education Interventions on Skinfolds Thickness Between Intervention and Control Groups for Each Study

**eFigure 13.** Forest Plot Showing the Effect Size (Hedges  $g$ ) of Quantity-Based Physical Education Interventions on Body Fat Between Intervention and Control Groups for Each Study

**eFigure 14.** Forest Plot Showing the Effect Size (Hedges  $g$ ) of Quantity-Based Physical Education Interventions on Cardiorespiratory Fitness Between Intervention and Control Groups for Each Study

**eFigure 15.** Forest Plot Showing the Effect Size (Hedges  $g$ ) of Quantity-Based Physical Education Interventions on Muscular Strength Between Intervention and Control Groups for Each Study

**eFigure 16.** Forest Plot Showing the Effect Size (Hedges  $g$ ) of Quantity-Based Physical Education Interventions on Speed Agility Between Intervention and Control Groups for Each Study

**eFigure 17.** Forest Plot Showing the Effect Size (Hedges  $g$ ) of Quantity-Based Physical Education Interventions on Fundamental Motor Skills Between Intervention and Control Groups for Each Study

**eFigure 18.** Meta-Regression Analysis of the Association Between Difference in Hours of Physical Education per Week of Intervention Group vs Control Group With Body Mass Index Changes

**eFigure 19.** Meta-Regression Analysis of the Association Between Difference in Hours of Physical Education per Week of Intervention Group vs Control Group With Waist Circumference Changes

**eFigure 20.** Meta-Regression Analysis of the Association Between Difference in Hours of Physical Education per Week of Intervention Group vs Control Group With Skinfolds Thickness Changes

**eFigure 21.** Meta-Regression Analysis of the Association Between Difference in Hours of Physical Education per Week of Intervention Group vs Control Group With Cardiorespiratory Fitness Changes

**eFigure 22.** Meta-Regression Analysis of the Association Between Difference in Hours of Physical Education per Week of Intervention Group vs Control Group With Muscular Strength Changes

**eFigure 23.** Meta-Regression Analysis of the Association Between Difference in Hours of Physical Education per Week of Intervention Group vs Control Group With Speed Agility Changes

**eFigure 24.** Meta-Regression Analysis of The Association Between Difference in Hours of Physical Education per Week of Intervention Group vs Control Group With Fundamental Motor Skills Changes

### eReferences

**This supplementary material has been provided by the authors to give readers additional information about their work.**

| <b>eTable 1. Risk of bias within studies</b> |                   |                      |                        |                |                  |                 |                    |                             |                           |                                 |             |
|----------------------------------------------|-------------------|----------------------|------------------------|----------------|------------------|-----------------|--------------------|-----------------------------|---------------------------|---------------------------------|-------------|
|                                              | Random allocation | Concealed allocation | Baseline comparability | Blind subjects | Blind therapists | Blind assessors | Adequate follow-up | Intention-to-treat analysis | Between-group comparisons | Point estimates and variability | Total score |
| <b>Quantity-based physical education</b>     |                   |                      |                        |                |                  |                 |                    |                             |                           |                                 |             |
| Alonso-Fernández <sup>1</sup>                | 1                 | 0                    | 1                      | 0              | 0                | 0               | 0                  | 0                           | 1                         | 1                               | 4           |
| Baquet <sup>2</sup>                          | 0                 | 0                    | 1                      | 0              | 0                | 0               | 0                  | 0                           | 1                         | 1                               | 3           |
| Boyle-Holmes <sup>3</sup>                    | 0                 | 0                    | 1                      | 0              | 0                | 0               | 1                  | 0                           | 1                         | 1                               | 4           |
| Carrel <sup>4</sup>                          | 1                 | 0                    | 1                      | 0              | 0                | 0               | 1                  | 0                           | 1                         | 1                               | 5           |
| Chavarro <sup>5</sup>                        | 1                 | 0                    | 1                      | 0              | 0                | 0               | 0                  | 0                           | 1                         | 1                               | 4           |
| Cohen <sup>6</sup>                           | 1                 | 1                    | 1                      | 0              | 0                | 1               | 1                  | 1                           | 1                         | 1                               | 8           |
| Costigan <sup>7</sup>                        | 1                 | 0                    | 1                      | 0              | 0                | 1               | 0                  | 0                           | 1                         | 1                               | 5           |
| Cvejić <sup>8</sup>                          | 1                 | 0                    | 1                      | 0              | 0                | 1               | 0                  | 0                           | 1                         | 1                               | 5           |
| Daly <sup>9</sup>                            | 1                 | 1                    | 1                      | 0              | 0                | 1               | 1                  | 0                           | 1                         | 1                               | 7           |
| Dalziell <sup>10</sup>                       | 1                 | 0                    | 1                      | 0              | 0                | 0               | 0                  | 0                           | 1                         | 1                               | 4           |
| Delgado-Flody <sup>11</sup>                  | 0                 | 0                    | 1                      | 0              | 0                | 0               | 0                  | 0                           | 1                         | 1                               | 3           |
| Faigenbaum and Mediate <sup>12</sup>         | 0                 | 0                    | 1                      | 0              | 0                | 0               | 0                  | 0                           | 1                         | 1                               | 3           |
| Gallotta <sup>13</sup>                       | 1                 | 0                    | 1                      | 0              | 0                | 1               | 0                  | 0                           | 1                         | 1                               | 5           |
| Jarani <sup>14</sup>                         | 1                 | 0                    | 1                      | 0              | 0                | 0               | 0                  | 1                           | 1                         | 1                               | 5           |
| Lucertini <sup>15</sup>                      | 1                 | 0                    | 1                      | 0              | 0                | 0               | 0                  | 0                           | 1                         | 1                               | 4           |
| Marshall <sup>16</sup>                       | 1                 | 0                    | 1                      | 0              | 0                | 1               | 0                  | 0                           | 1                         | 1                               | 5           |
| Mayorga-Vega <sup>17</sup>                   | 0                 | 0                    | 1                      | 0              | 0                | 1               | 0                  | 0                           | 1                         | 1                               | 4           |
| Mayorga-Vega <sup>18</sup>                   | 1                 | 0                    | 1                      | 0              | 0                | 0               | 0                  | 0                           | 1                         | 1                               | 4           |
| McKay <sup>19</sup>                          | 1                 | 0                    | 1                      | 0              | 0                | 0               | 1                  | 0                           | 1                         | 1                               | 5           |
| McKenzie <sup>20</sup>                       | 1                 | 0                    | 1                      | 0              | 0                | 0               | 0                  | 0                           | 1                         | 1                               | 4           |
| Neumark-Sztainer <sup>21</sup>               | 1                 | 0                    | 0                      | 0              | 0                | 0               | 1                  | 0                           | 1                         | 1                               | 4           |
| Nogueira <sup>22</sup>                       | 1                 | 0                    | 0                      | 0              | 0                | 0               | 1                  | 1                           | 1                         | 1                               | 5           |
| Pate <sup>23</sup>                           | 1                 | 0                    | 0                      | 0              | 0                | 0               | 0                  | 0                           | 1                         | 1                               | 3           |
| Pesce <sup>24</sup>                          | 0                 | 0                    | 1                      | 0              | 0                | 0               | 0                  | 0                           | 1                         | 1                               | 4           |
| Pesce <sup>25</sup>                          | 1                 | 0                    | 1                      | 0              | 0                | 0               | 0                  | 0                           | 1                         | 1                               | 4           |
| Ramírez <sup>26</sup>                        | 1                 | 0                    | 1                      | 0              | 0                | 0               | 0                  | 0                           | 1                         | 1                               | 4           |
| Sallis <sup>27</sup>                         | 1                 | 0                    | 1                      | 0              | 0                | 0               | 0                  | 0                           | 1                         | 1                               | 4           |
| Schmidt <sup>28</sup>                        | 1                 | 0                    | 0                      | 0              | 0                | 0               | 0                  | 0                           | 1                         | 1                               | 3           |
| Telford <sup>29</sup>                        | 1                 | 0                    | 1                      | 0              | 0                | 0               | 1                  | 0                           | 1                         | 1                               | 5           |
| Teen Hoor <sup>30</sup>                      | 1                 | 0                    | 1                      | 0              | 0                | 0               | 0                  | 0                           | 1                         | 1                               | 4           |
| van Beurden <sup>31</sup>                    | 1                 | 0                    | 1                      | 0              | 0                | 0               | 1                  | 0                           | 1                         | 1                               | 5           |
| Webber <sup>32</sup>                         | 1                 | 0                    | 1                      | 0              | 0                | 0               | 1                  | 0                           | 1                         | 1                               | 5           |
| Weeks <sup>33</sup>                          | 1                 | 0                    | 1                      | 0              | 0                | 0               | 1                  | 1                           | 1                         | 1                               | 6           |
| Young <sup>34</sup>                          | 1                 | 0                    | 1                      | 0              | 0                | 0               | 1                  | 0                           | 1                         | 1                               | 5           |
| <b>Quantity-based physical education</b>     |                   |                      |                        |                |                  |                 |                    |                             |                           |                                 |             |

|                                             |   |   |   |   |   |   |   |   |   |   |   |
|---------------------------------------------|---|---|---|---|---|---|---|---|---|---|---|
| Arday <sup>35</sup>                         | 1 | 0 | 1 | 0 | 0 | 0 | 0 | 1 | 1 | 1 | 5 |
| Bugge <sup>36</sup>                         | 1 | 0 | 1 | 0 | 0 | 0 | 1 | 0 | 1 | 1 | 5 |
| Erfle and Gamble <sup>37</sup>              | 0 | 0 | 1 | 0 | 0 | 0 | 0 | 0 | 1 | 1 | 3 |
| Ericsson and Karlsson <sup>38</sup>         | 0 | 0 | 1 | 0 | 0 | 0 | 1 | 0 | 1 | 1 | 4 |
| Hansen <sup>39</sup>                        | 1 | 0 | 1 | 0 | 0 | 0 | 1 | 1 | 1 | 1 | 6 |
| Heidemann <sup>40</sup>                     | 0 | 0 | 1 | 0 | 0 | 0 | 1 | 0 | 1 | 1 | 4 |
| Jurak <sup>41</sup>                         | 0 | 0 | 1 | 0 | 0 | 0 | 1 | 0 | 1 | 1 | 3 |
| Klakk <sup>42</sup>                         | 0 | 0 | 1 | 0 | 0 | 0 | 1 | 0 | 1 | 1 | 4 |
| Kriemler <sup>43</sup>                      | 1 | 1 | 1 | 0 | 0 | 1 | 1 | 1 | 1 | 1 | 8 |
| Learmonth <sup>44</sup>                     | 0 | 0 | 1 | 0 | 0 | 1 | 1 | 0 | 1 | 1 | 5 |
| Löfgren <sup>45</sup>                       | 0 | 0 | 1 | 0 | 0 | 0 | 1 | 0 | 1 | 1 | 4 |
| Lopes <sup>46</sup>                         | 1 | 0 | 1 | 0 | 0 | 0 | 0 | 0 | 1 | 1 | 4 |
| Meyer <sup>47</sup>                         | 1 | 0 | 1 | 0 | 0 | 1 | 0 | 0 | 1 | 1 | 5 |
| Piéron <sup>48</sup>                        | 0 | 0 | 1 | 0 | 0 | 0 | 1 | 0 | 1 | 1 | 3 |
| Reed <sup>49</sup>                          | 0 | 0 | 1 | 0 | 0 | 0 | 1 | 0 | 1 | 1 | 4 |
| Rexen <sup>50</sup>                         | 0 | 0 | 1 | 0 | 0 | 0 | 1 | 1 | 1 | 1 | 5 |
| Sacchetti <sup>51</sup>                     | 1 | 0 | 1 | 0 | 0 | 0 | 0 | 0 | 1 | 1 | 4 |
| Shephard and Lavallée <sup>52, 53, 54</sup> | 0 | 0 | 1 | 0 | 0 | 0 | 1 | 0 | 1 | 1 | 4 |
| Sollerhed and Ejlertsson <sup>55</sup>      | 0 | 0 | 1 | 0 | 0 | 0 | 1 | 0 | 1 | 1 | 4 |

1, yes; 0, No

| <b>eTable 2.</b> Synthesis of pooled results according to education level |                                  |          |                |       |                |                |                                   |          |               |       |                |                |
|---------------------------------------------------------------------------|----------------------------------|----------|----------------|-------|----------------|----------------|-----------------------------------|----------|---------------|-------|----------------|----------------|
|                                                                           | Quality-based physical education |          |                |       |                |                | Quantity-based physical education |          |               |       |                |                |
|                                                                           | Studies (Participants)           | Hedges g | 95% CI         | p     | I <sup>2</sup> | Egger test (p) | Studies (Participants)            | Hedges g | 95% CI        | p     | I <sup>2</sup> | Egger test (p) |
| Primary education                                                         |                                  |          |                |       |                |                |                                   |          |               |       |                |                |
| Health-related physical fitness                                           |                                  |          |                |       |                |                |                                   |          |               |       |                |                |
| Body mass index                                                           | 7 (2,414)                        | -0.19    | -0.27 to -0.12 | <.001 | 0              | .54            | 10 (4,081)                        | -0.01    | -0.09 to 0.07 | .81   | 34.15          | .81            |
| Waist circumference                                                       | -                                |          |                |       |                |                | 4 (1,870)                         | -0.04    | -0.14 to 0.07 | .48   | 0              | .88            |
| Skinfolds thickness                                                       | 3 (1,641)                        | -0.04    | -0.23 to 0.14  | .63   | 63.68          | .37            | 4 (2,258)                         | -0.05    | -0.16 to 0.06 | .34   | 0              | .07            |
| Body fat                                                                  | 7 (2,024)                        | -0.26    | -0.38 to -0.13 | <.001 | 28.99          | .47            | 3 (1,581)                         | 0.16     | -0.06 to 0.39 | .16   | 77.09          | .16            |
| Lean body mass                                                            | -                                |          |                |       |                |                | -                                 |          |               |       |                |                |
| Cardiorespiratory fitness                                                 | 15 (10,439)                      | 0.24     | 0.15 to 0.33   | <.001 | 58.17          | .01            | 8 (3,346)                         | 0.46     | 0.29 to 0.64  | <.001 | 73.79          | .05            |
| Muscular strength                                                         | 8 (3,914)                        | 0.21     | 0.08 to 0.34   | .001  | 68.99          | .18            | 7 (2,907)                         | 0.25     | 0.15 to 0.36  | <.001 | 22.65          | .99            |
| Speed agility                                                             | 3 (1,412)                        | 0.11     | -0.15 to 0.37  | .39   | 77.13          | .03            | 3 (2,013)                         | 0.29     | 0.05 to 0.53  | .02   | 80.05          | .12            |
| Fundamental motor skills                                                  | 7 (3,873)                        | 0.38     | 0.27 to 0.49   | <.001 | 73.43          | .002           | 4 (1,659)                         | 0.20     | -0.01 to 0.42 | .06   | 79.03          | .20            |
| Secondary education                                                       |                                  |          |                |       |                |                |                                   |          |               |       |                |                |
| Health-related physical fitness                                           |                                  |          |                |       |                |                |                                   |          |               |       |                |                |
| Body mass index                                                           | 7 (2,875)                        | -0.04    | -0.10 to 0.02  | .20   | 0              | .33            | -                                 |          |               |       |                |                |
| Waist circumference                                                       | -                                |          |                |       |                |                | -                                 |          |               |       |                |                |
| Skinfolds thickness                                                       | -                                |          |                |       |                |                | -                                 |          |               |       |                |                |
| Body fat                                                                  | 4 (2,532)                        | -0.13    | -0.29 to 0.02  | .09   | 53.39          | .24            | -                                 |          |               |       |                |                |
| Lean body mass                                                            | -                                |          |                |       |                |                | -                                 |          |               |       |                |                |
| Cardiorespiratory fitness                                                 | 5 (837)                          | 0.29     | 0.10 to 0.47   | .002  | 0              | .04            | 3 (10,357)                        | 0.37     | 0.07 to 0.67  | .02   | 44.30          | .76            |
| Muscular strength                                                         | 5 (944)                          |          |                |       |                |                | -                                 |          |               |       |                |                |
| Speed agility                                                             | -                                |          |                |       |                |                | -                                 |          |               |       |                |                |
| Fundamental motor skills                                                  | -                                |          |                |       |                |                | -                                 |          |               |       |                |                |

**Figure 1.** Forest plot showing the effect size (Hedges *g*) of quality-based physical education interventions on body mass index between intervention and control groups for each study.

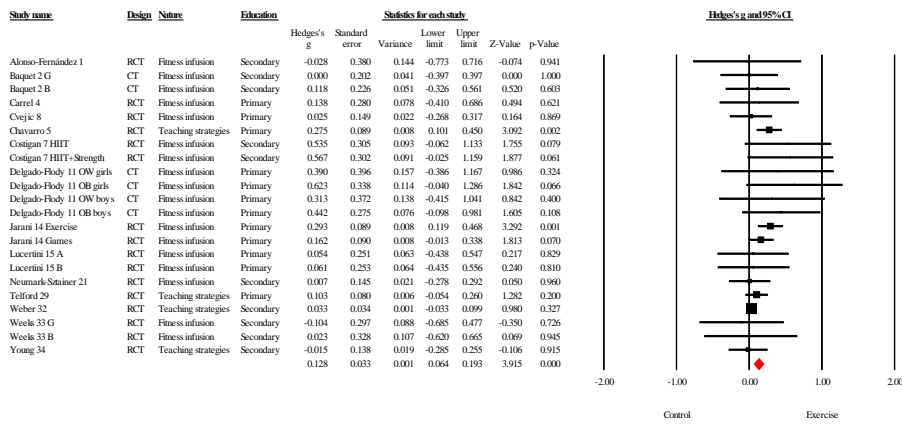

B, boys; G, girls; OB, obese; OW, overweight

**eFigure 2.** Forest plot showing the effect size (Hedges *g*) of quality-based physical education interventions on waist circumference between intervention and control groups for each study.

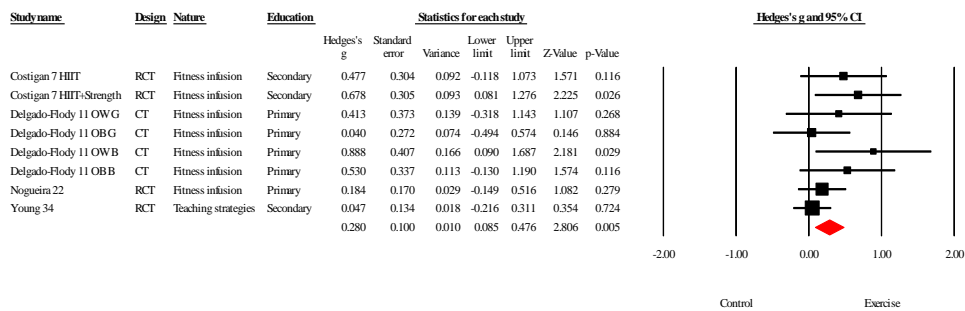

B, boys; G, girls; HIIT, high-intensity interval training; OB, obese; OW, overweight

**eFigure 3.** Forest plot showing the effect size (Hedges *g*) of quality-based physical education interventions on skinfolds thickness between intervention and control groups for each study.

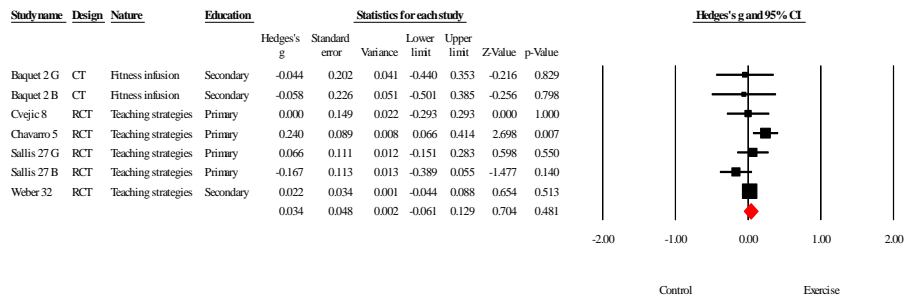

B, boys; G, girls

**eFigure 4.** Forest plot showing the effect size (Hedges *g*) of quality-based physical education interventions on body fat between intervention and control groups for each study.

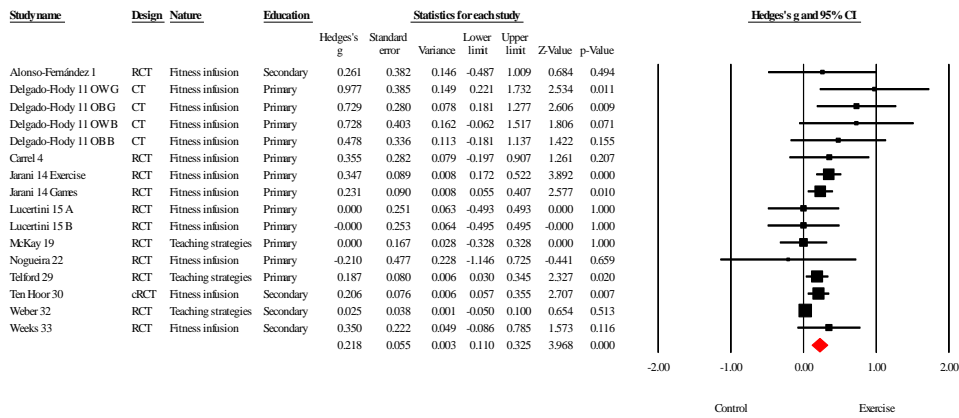

B, boys; G, girls; OB, obese; OW, overweight



**eFigure 5.** Forest plot showing the effect size (Hedges *g*) of quality-based physical education interventions on lean body mass between intervention and control groups for each study.

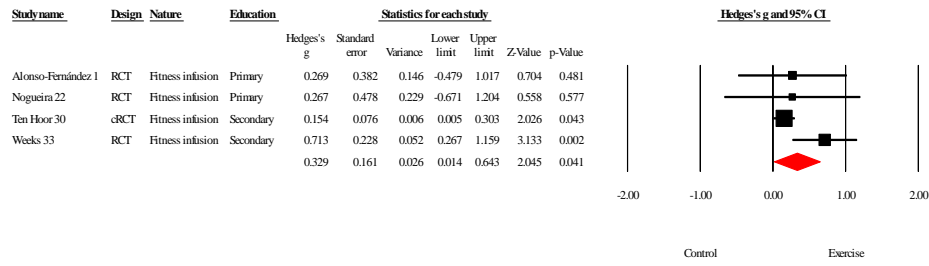

**eFigure 6.** Forest plot showing the effect size (Hedges *g*) of quality-based physical education interventions on cardiorespiratory fitness between intervention and control groups for each study.

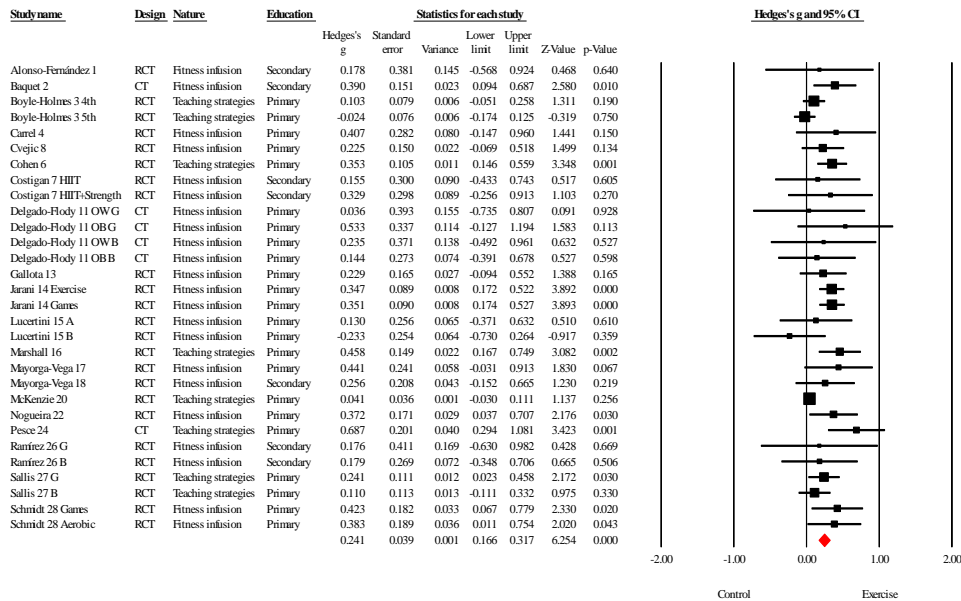

B, boys; G, girls; HIIT, high-intensity interval training; OB, obese; OW, overweight

**eFigure 7.** Forest plot showing the effect size (Hedges *g*) of quality-based physical education interventions on muscular strength between intervention and control groups for each study.

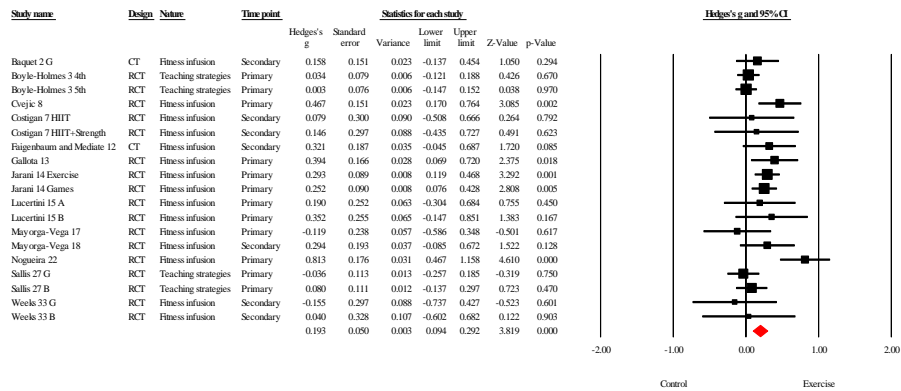

B, boys; G, girls; HIIT, high-intensity interval training

**eFigure 8.** Forest plot showing the effect size (Hedges *g*) of quality-based physical education interventions on speed agility between intervention and control groups for each study.

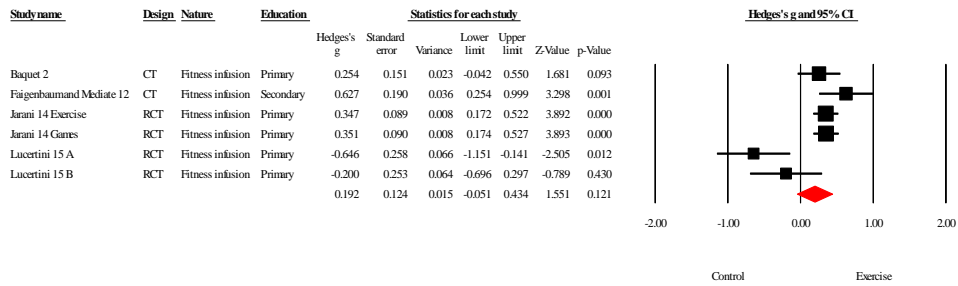

**eFigure 9.** Forest plot showing the effect size (Hedges *g*) of quality-based physical education interventions on fundamental motor skills between intervention and control groups for each study.

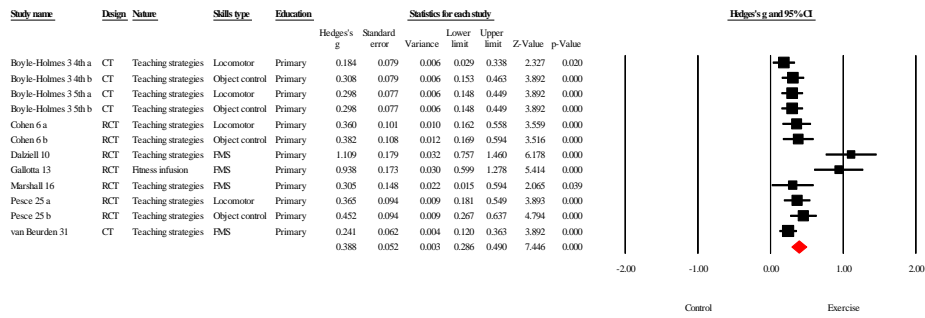

**eFigure 10.** Forest plot showing the effect size (Hedges *g*) of quantity-based physical education interventions on body mass index between intervention and control groups for each study.

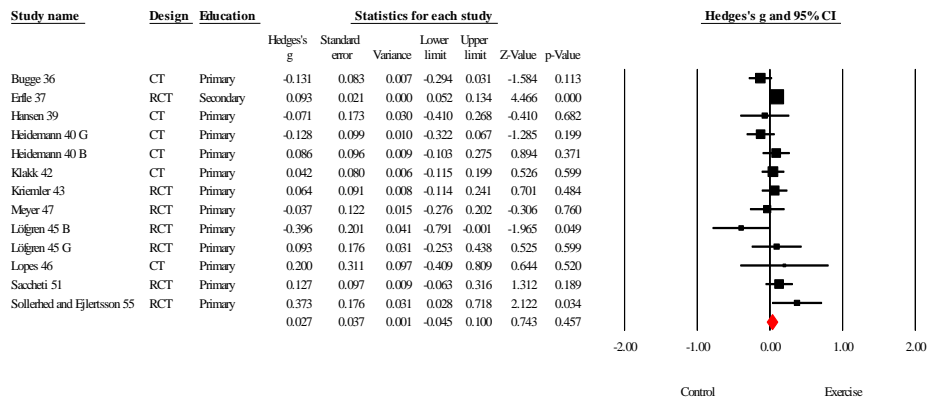

B, boys; G, girls.

**eFigure 11.** Forest plot showing the effect size (Hedges *g*) of quantity-based physical education interventions on waist circumference between intervention and control groups for each study.

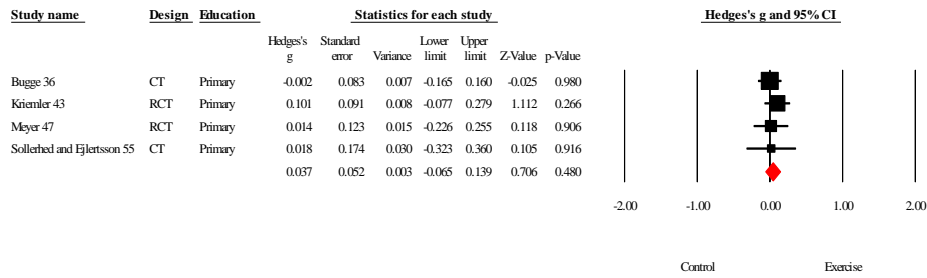

**eFigure 12.** Forest plot showing the effect size (Hedges *g*) of quantity-based physical education interventions on skinfolds thickness between intervention and control groups for each study.

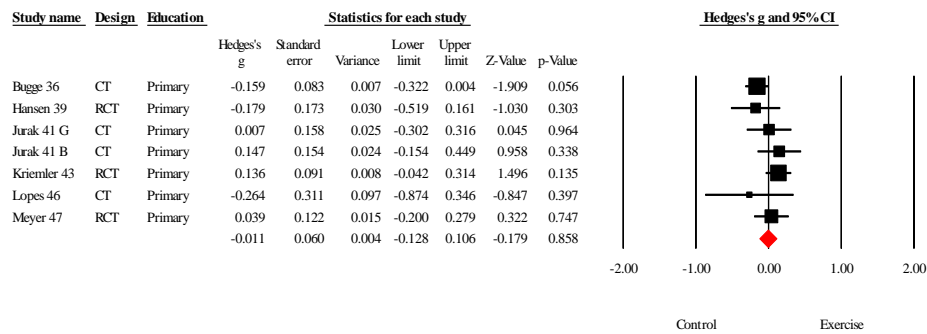

B, boys; G, girls.



**eFigure 13.** Forest plot showing the effect size (Hedges *g*) of quantity-based physical education interventions on body fat between intervention and control groups for each study.

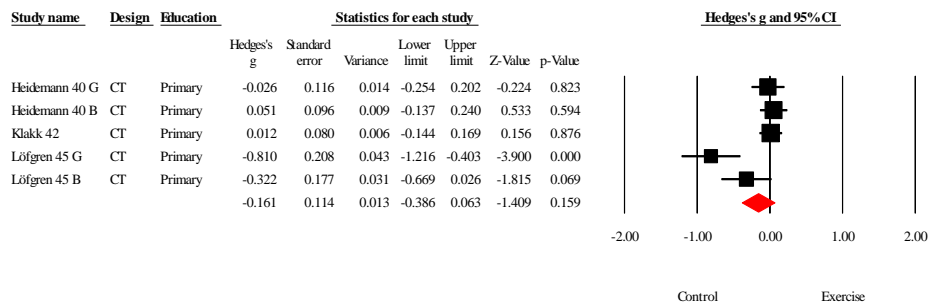

B, boys; G, girls.

**eFigure 14.** Forest plot showing the effect size (Hedges *g*) of quantity-based physical education interventions on cardiorespiratory fitness between intervention and control groups for each study.

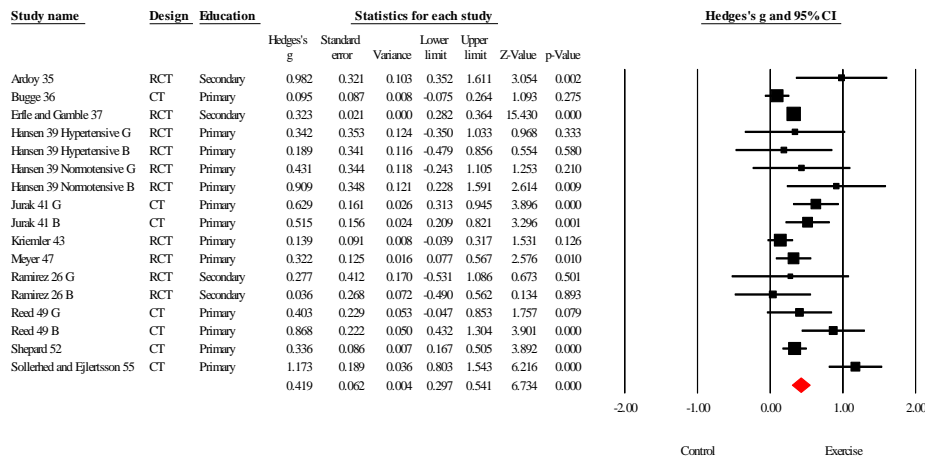

B, boys; G, girls.

**eFigure 15.** Forest plot showing the effect size (Hedges *g*) of quantity-based physical education interventions on muscular strength between intervention and control groups for each study.

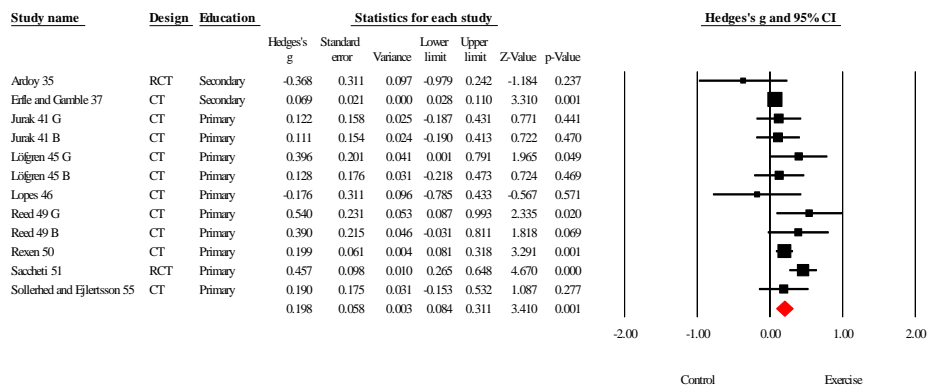

B, boys; G, girls.

**eFigure 16.** Forest plot showing the effect size (Hedges *g*) of quantity-based physical education interventions on speed agility between intervention and control groups for each study.

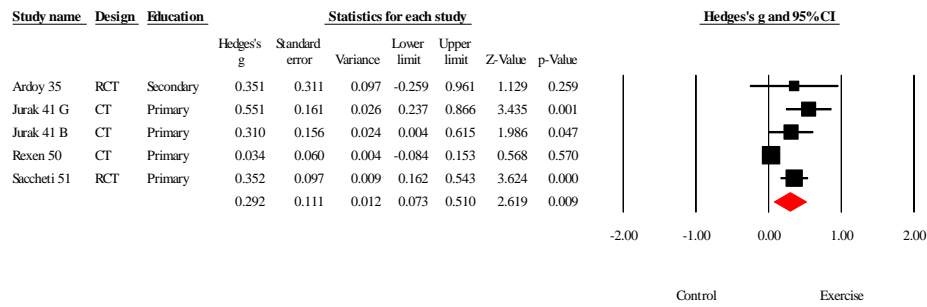

B, boys; G, girls.

**eFigure 17.** Forest plot showing the effect size (Hedges *g*) of quantity-based physical education interventions on fundamental motor skills between intervention and control groups for each study.

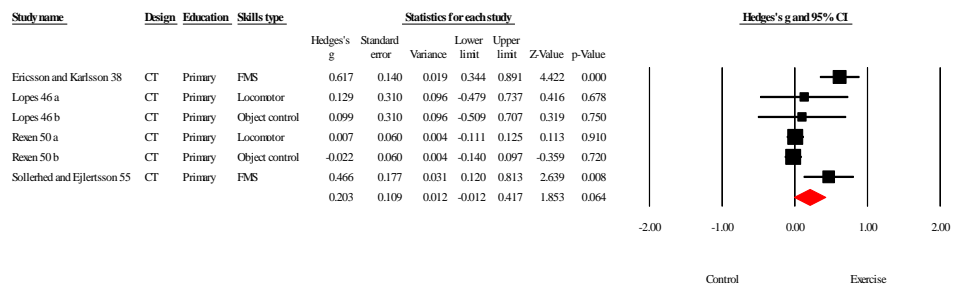

**eFigure 18.** Meta-regression analysis of the association between difference in hours of physical education per week of intervention group vs control group with body mass index changes.

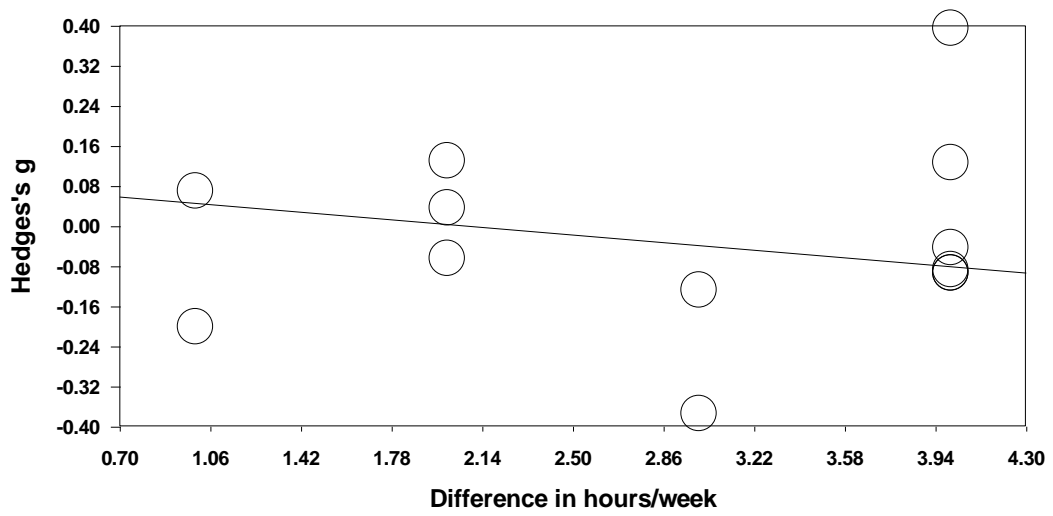

$\beta = -0.04$ , 95% CI -0.09 to 0.01,  $p = 0.092$

**eFigure 19.** Meta-regression analysis of the association between difference in hours of physical education per week of intervention group vs control group with waist circumference changes.

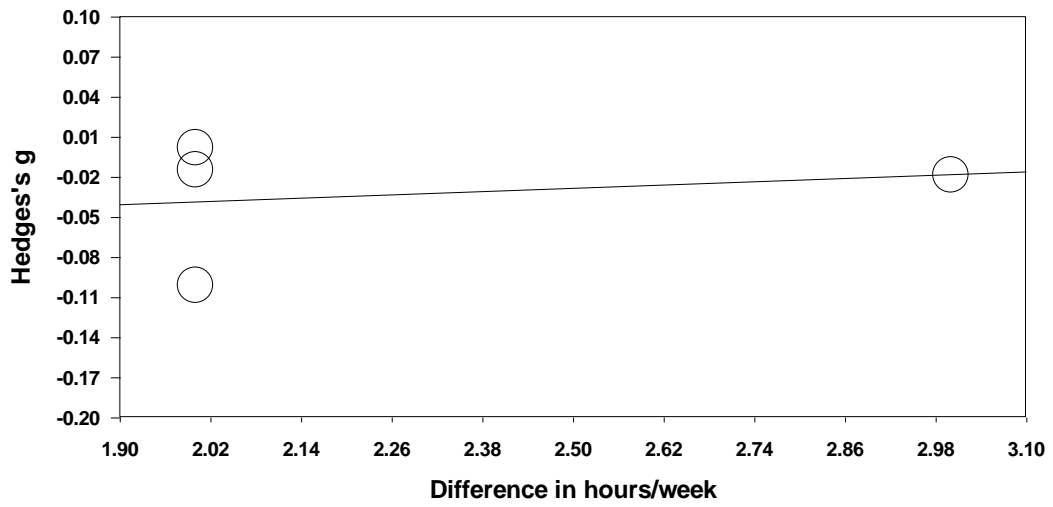

$\beta=0.02$ , 95% CI -0.34 to 0.38,  $p=0.911$

**eFigure 20.** Meta-regression analysis of the association between difference in hours of physical education per week of intervention group vs control group with skinfolds thickness changes.

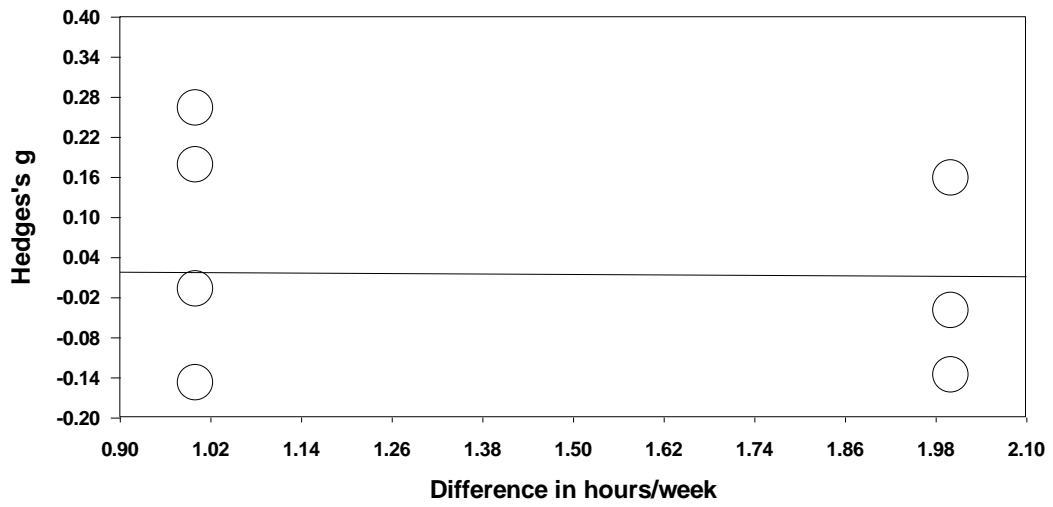

$\beta = -0.01$ , 95% CI -0.21 to 0.20,  $p = 0.957$



**eFigure 21.** Meta-regression analysis of the association between difference in hours of physical education per week of intervention group vs control group with cardiorespiratory fitness changes.

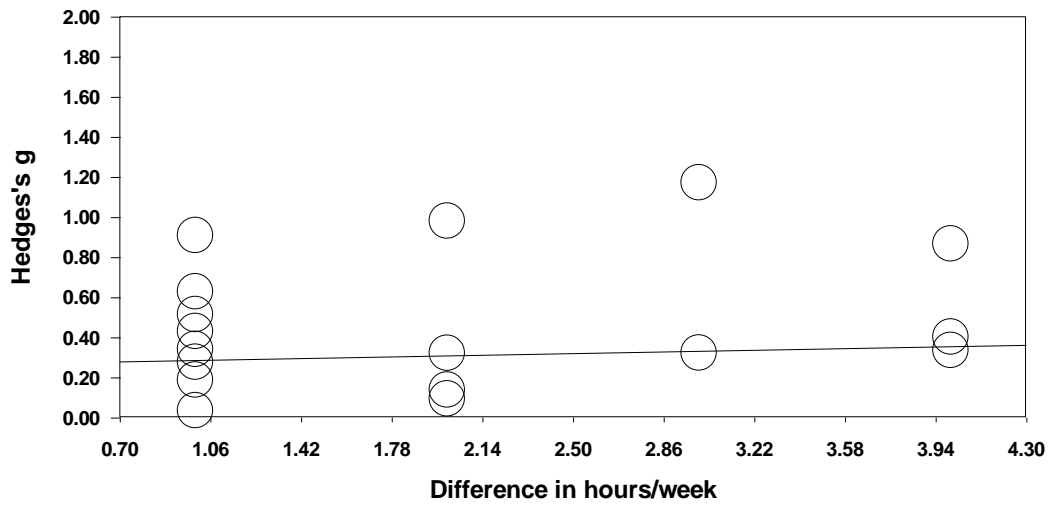

$\beta=0.02$ , 95% CI -0.04 to 0.08,  $p=0.473$

**eFigure 22.** Meta-regression analysis of the association between difference in hours of physical education per week of intervention group vs control group with muscular strength changes.

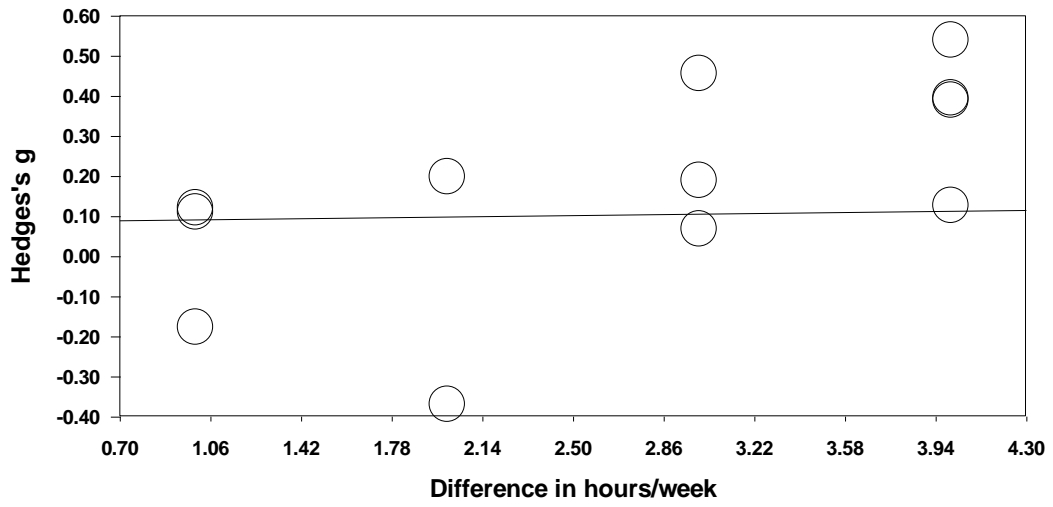

$\beta=0.01$ , 95% CI -0.07 to 0.08,  $p=0.848$

**eFigure 23.** Meta-regression analysis of the association between difference in hours of physical education per week of intervention group vs control group with speed-agility changes.

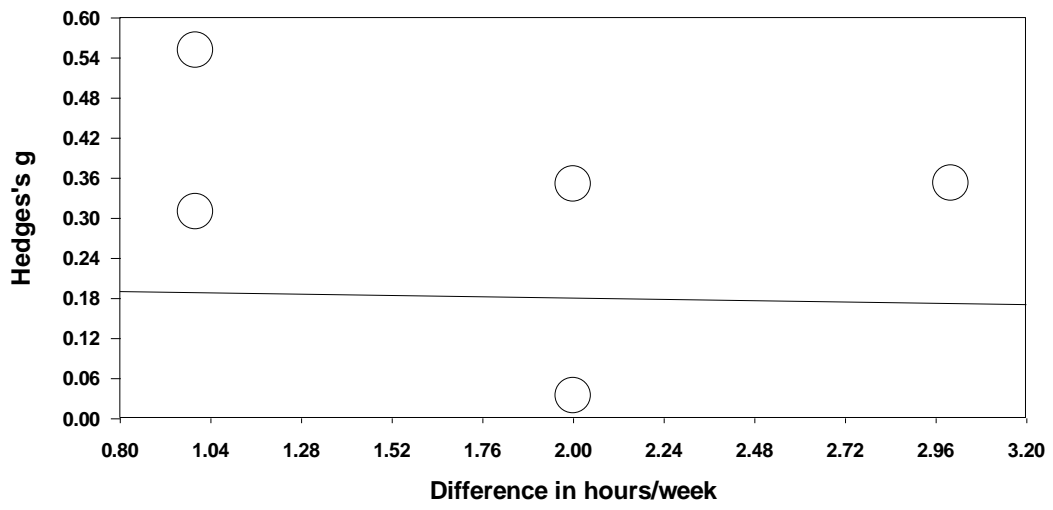

$\beta=-0.01$ , 95% CI -0.15 to 0.14,  $p=0.912$

**eFigure 24.** Meta-regression analysis of the association between difference in hours of physical education per week of intervention group vs control group with fundamental motor skills changes.

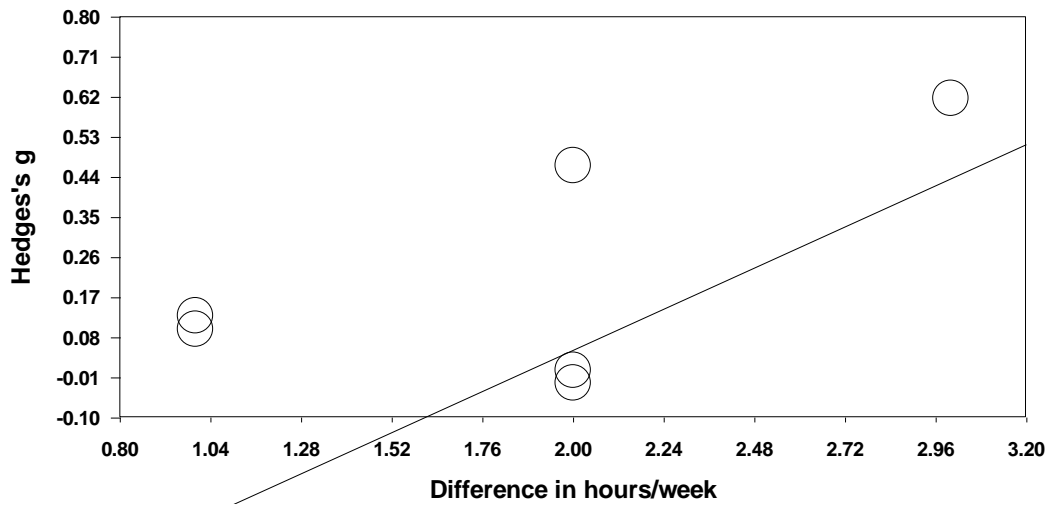

$\beta=0.38$ , 95% CI 0.15 to 0.62,  $p=0.001$

## References

1. Alonso-Fernández D, Fernández-Rodríguez R, Taboada-Iglesias Y, et al. Impact of a HIIT protocol on body composition and VO<sub>2</sub>max in adolescents. *Science & Sports* 2019;34:341–7
2. Baquet G, Berthoin S, Gerbeaux M, et al. High-intensity aerobic training during a 10 week one-hour physical education cycle: effects on physical fitness of adolescents aged 11 to 16. *Int J Sports Med* 2001;22:295–300.
3. Boyle-Holmes T, Grost L, Russell L, et al. Promoting Elementary Physical Education: Results of a School-Based Evaluation Study. *Heal Educ Behav* 2010;37:377–89.
4. Carrel AL, Clark RR, Peterson SE, et al. Improvement of fitness, body composition, and insulin sensitivity in overweight children in a school-based exercise program: a randomized, controlled study. *Arch Pediatr Adolesc Med* 2005;159:963–8. doi:10.1001/archpedi.159.10.963
5. Chavarro JE, Peterson KE, Sobol AM, et al. Effects of a school-based obesity-prevention intervention on menarche (United States). *Cancer Causes Control* 2005;16:1245–52.
6. Cohen KE, Morgan PJ, Plotnikoff RC, et al. Physical Activity and Skills Intervention. *Med Sci Sport Exerc* 2015;47:765–74.
7. Costigan SA, Eather N, Plotnikoff RC, et al. Preliminary efficacy and feasibility of embedding high intensity interval training into the school day: A pilot randomized controlled trial. *Prev Med Reports* 2015;2:973–9.
8. Cvejic D, Universitatis SO-F, Physical S, et al. Effects of the FITT program on physical activity and health-related fitness in primary school age children. *Facta Univ Phys Educ Sport* 2017;15:437–51.
9. Daly RM, Ducher G, Hill B, et al. Effects of a Specialist-Led, School Physical Education Program on Bone Mass, Structure, and Strength in Primary School Children: A 4-Year Cluster Randomized Controlled Trial. *J Bone Miner Res* 2016;31:289–98.
10. Dalziell A, Booth JN, Boyle J, et al. Better Movers and Thinkers: An evaluation of how a novel approach to teaching physical education can impact children's physical activity, coordination and cognition. *Br Educ Res J* 2019;45:576–91. doi:10.1002/berj.3514
11. Delgado-Floody P, Espinoza-Silva M, García-Pinillos F, Latorre-Román P. Effects of 28 weeks of high-intensity interval training during physical education classes on cardiometabolic risk factors in Chilean schoolchildren: a pilot trial. *Eur J Pediatr*. 2018;177(7):1019-1027.
12. Faigenbaum A, Mediate P. The effects of medicine ball training on physical fitness in high school physical education students. *The Physical Educator* 2006;63:160–7.

13. Gallotta MC, Emerenziani G Pietro, Iazzoni S, et al. Effects of different physical education programmes on children's skill- and health-related outcomes: a pilot randomised controlled trial. *J Sports Sci* 2017;35:1547–55.
14. Jarani J, Grøntved A, Muca F, et al. Effects of two physical education programmes on health- and skill-related physical fitness of Albanian children. *J Sports Sci* 2016;34:35–46.
15. Lucertini F, Spazzafumo L, De Lillo F, et al. Effectiveness of professionally-guided physical education on fitness outcomes of primary school children. *Eur J Sport Sci* 2013;13:582–90.
16. Marshall J, Bouffard M. The effects of quality daily physical education on movement competency in obese versus nonobese children. *Adapt Phys Act Q* 1997;14(3):222–37.
17. Mayorga-Vega D, Viciana J, Cocca A, et al. Effect of a Physical Fitness Program on Physical Self-Concept and Physical Fitness Elements in Primary School Students. *Percept Mot Skills* 2012;115:984–96.
18. Mayorga-Vega D, Montoro-Escañó J, Merino-Marban R, et al. Effects of a physical education-based programme on health-related physical fitness and its maintenance in high school students. *Eur Phys Educ Rev* 2016;22:243–59.
19. McKay HA, Petit MA, Schutz RW, et al. Augmented trochanteric bone mineral density after modified physical education classes: A randomized school-based exercise intervention study in prepubescent and early pubescent children. *J Pediatr* 2000;136:156–62.
20. McKenzie TL, Nader PR, Strikmiller PK, et al. School physical education: effect of the Child and Adolescent Trial for Cardiovascular Health. *Prev Med (Baltim)* 1996;25:423–31.
21. Neumark-Sztainer D, Story M, Hannan PJ, et al. New Moves: a school-based obesity prevention program for adolescent girls. *Prev Med (Baltim)* 2003;37:41–51.
22. Nogueira RC, Weeks BK, Beck BR. An in-school exercise intervention to enhance bone and reduce fat in girls: the CAPO Kids trial. *Bone* 2014;68:92–9.
23. Pate RR, Ward DS, Saunders RP, et al. Promotion of Physical Activity Among High-School Girls: A Randomized Controlled Trial. *Am J Public Health* 2005;95:1582–7.
24. Pesce C, Faigenbaum A, Crova C, Marchetti R, Bellucci M. Benefits of multi-sports physical education in the elementary school context. *Health Educ J* 2013;72:326–336.
25. Pesce C, Masci I, Marchetti R, et al. Deliberate Play and Preparation Jointly Benefit Motor and Cognitive Development: Mediated and Moderated Effects. *Front*

Psychol 2016;7:349.

26. Ramírez Lechuga J, Muros Molina JJ, Morente Sánchez J, et al. [Effect of an 8-week aerobic training program during physical education lessons on aerobic fitness in adolescents]. *Nutr Hosp*;27:747–54.
27. Sallis JF, McKenzie TL, Alcaraz JE, et al. The effects of a 2-year physical education program (SPARK) on physical activity and fitness in elementary school students. *Sports, Play and Active Recreation for Kids. Am J Public Health* 1997;87:1328–34.
28. Schmidt M, Jäger K, Egger F, et al. Cognitively Engaging Chronic Physical Activity, But Not Aerobic Exercise, Affects Executive Functions in Primary School Children: A Group-Randomized Controlled Trial. *J Sport Exerc Psychol* 2015;37:575–91.
29. Telford RD, Cunningham RB, Fitzgerald R, et al. Physical education, obesity, and academic achievement: a 2-year longitudinal investigation of Australian elementary school children. *Am J Public Health* 2012;102:368–74.
30. Ten Hoor GA, Rutten GM, Van Breukelen GJP, et al. Strength exercises during physical education classes in secondary schools improve body composition: a cluster randomized controlled trial. *Int J Behav Nutr Phys Act.* 2018;15(1):92. doi:10.1186/s12966-018-0727-8
31. van Beurden E, Barnett L., Zask A, et al. Can we skill and activate children through primary school physical education lessons? “move it groove it”—a collaborative health promotion intervention. *Prev Med (Baltim)* 2003;36:493–501.
32. Webber LS, Catellier DJ, Lytle LA, et al. Promoting Physical Activity in Middle School Girls. *Am J Prev Med* 2008;34:173–84.
33. Weeks BK, Young CM, Beck BR. Eight months of regular in-school jumping improves indices of bone strength in adolescent boys and Girls: the POWER PE study. *J Bone Miner Res* 2008;23:1002–11.
34. Young DR, Phillips JA, Yu T, et al. Effects of a Life Skills Intervention for Increasing Physical Activity in Adolescent Girls. *Arch Pediatr Adolesc Med* 2006;160:1255.
35. Ardoy DN, Fernández-Rodríguez JM, Ruiz JR, et al. [Improving physical fitness in adolescents through a school-based intervention: the EDUFIT study]. *Rev Esp Cardiol* 2011;64:484–91.
36. Bugge A, El-Naaman B, Dencker M, et al. Effects of a Three-Year Intervention. *Med Sci Sport Exerc* 2012;44:1310–7.
37. Erfle SE, Gamble A. Effects of daily physical education on physical fitness and weight status in middle school adolescents. *J Sch Health* 2015;85:27–35.

38. Ericsson I, Karlsson MK. Motor skills and school performance in children with daily physical education in school--a 9-year intervention study. *Scand J Med Sci Sports* 2014;24:273–8.
39. Hansen HS, Froberg K, Hyldebrandt N, et al. A controlled study of eight months of physical training and reduction of blood pressure in children: the Odense schoolchild study. *BMJ* 1991;303:682–5.
40. Heidemann M, Jespersen E, Holst R, et al. The impact on children's bone health of a school-based physical education program and participation in leisure time sports: the Childhood Health, Activity and Motor Performance School (the CHAMPS) study, Denmark. *Prev Med (Baltim)* 2013;57:87–91.
41. Jurak G, Kovač M, of JS-KI journal, et al. Impact of the additional physical education lessons programme on the physical and motor development of 7-to 10-year-old children. *Kinesiology* 2008;38(2):105–15.
42. Klakk H, Chinapaw M, Heidemann M, et al. Effect of four additional physical education lessons on body composition in children aged 8-13 years--a prospective study during two school years. *BMC Pediatr* 2013;13:170.
43. Kriemler S, Zahner L, Schindler C, et al. Effect of school based physical activity programme (KISS) on fitness and adiposity in primary schoolchildren: cluster randomised controlled trial. *BMJ* 2010;340:c785. doi:10.1136/bmj.c785
44. Learmonth YC, Hebert JJ, Fairchild TJ, et al. Physical education and leisure-time sport reduce overweight and obesity: a number needed to treat analysis. *Int J Obes (Lond)* 2019;43:2076–84.
45. Löfgren B, Daly RM, Nilsson J-Å, et al. An increase in school-based physical education increases muscle strength in children. *Med Sci Sports Exerc* 2013;45:997–1003.
46. Lopes VP, Stodden DF, Rodrigues LP. Effectiveness of physical education to promote motor competence in primary school children. *Phys Educ Sport Pedagog* 2017;22:589–602.
47. Meyer U, Schindler C, Zahner L, et al. Long-term effect of a school-based physical activity program (KISS) on fitness and adiposity in children: a cluster-randomized controlled trial. *PLoS One* 2014;9:e87929. doi:10.1371/journal.pone.0087929
48. Pieron M, Cloes M, Delfosse C, et al. An Investigation of the Effects of Daily Physical Education in Kindergarten and Elementary Schools. *Eur Phys Educ Rev* 1996;2:116–32.
49. Reed JA, Maslow AL, Long S, et al. Examining the impact of 45 minutes of daily physical education on cognitive ability, fitness performance, and body composition of African American youth. *J Phys Act Health* 2013;10:185–97.



50. Rexen CT, Ersbøll AK, Møller NC, et al. Effects of extra school-based physical education on overall physical fitness development--the CHAMPS study DK. *Scand J Med Sci Sports* 2015;25:706–15.
51. Sacchetti R, Ceciliani A, Garulli A, et al. Effects of a 2-year school-based intervention of enhanced physical education in the primary school. *J Sch Health* 2013;83:639–46.
52. Shephard RJ, Lavallée H. Enhanced physical education and body fat in the primary school child. *Am J Hum Biol* 1993;5:697–704. doi:10.1002/ajhb.1310050612
53. Shephard RJ, Lavallée H. Impact of enhanced physical education in the prepubescent child: Trois Rivieres revisited. *Pediatr Exerc Sci* 1993;5(2):177–89.
54. Shephard R, Lavallée H. Impact of enhanced physical education on muscle strength of the prepubescent child. *Pediatr Exerc Sci* 1994;6(1):75–87.
55. Sollerhed A-C, Ejlertsson G. Physical benefits of expanded physical education in primary school: findings from a 3-year intervention study in Sweden. *Scand J Med Sci Sports* 2007;18:102–7.
